# Supplementary material
Source: PubMed Central journal article supplement (PMC2605769)
Supplement: NIHMS76579-supplement-Sfig-1.pdf [file NIHMS76579-supplement-Sfig-1.pdf]

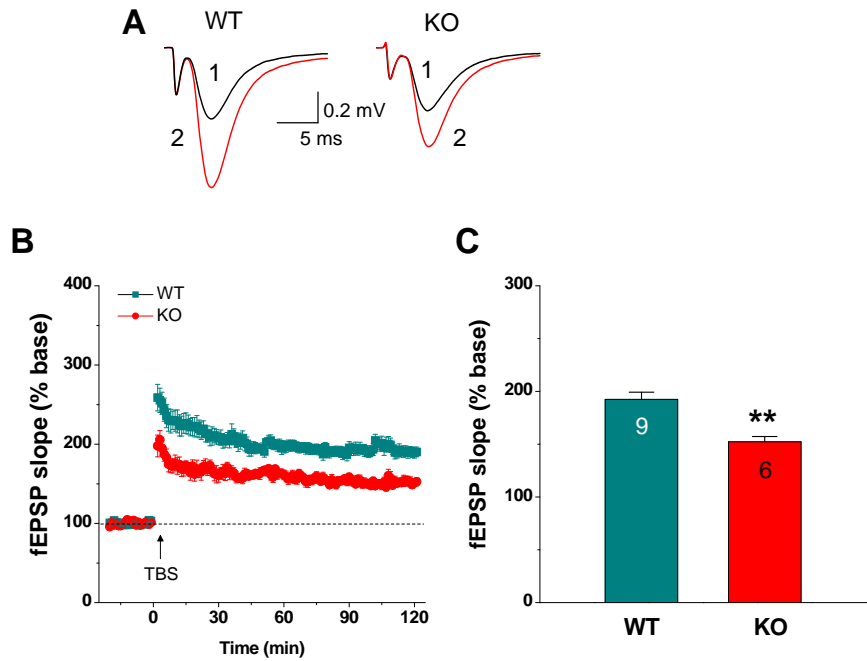

Supplemental figure 1. LTP at perirant path is reduced in EP2 null mice. LTP was induced by a TBS protocol as described in the methods section, and monitored for 120 min following TBS.
